# Supplementary material for: Cortisol, Depression, and Anxiety Levels Before and After Short-Term Intensive Nutritional Stabilization in Patients With Severe Anorexia Nervosa
Source: PubMed Central journal article supplement (PMC9314772; doi:10.3389/fpsyt.2022.939225), 2022-07-12
Supplement: Table_1.pdf [file Table_1.pdf]

## *Supplementary Material*

### 1. Dropout analysis

Supplementary Table 1. Demographic and baseline characteristics of participants who completed follow-up measurements and participants who dropped out of the study

|                                  | <b>Completers</b> | <b>Dropouts</b> | <b><i>p</i>-value</b> |
|----------------------------------|-------------------|-----------------|-----------------------|
| <b>Total, <i>n</i></b>           | 27                | 9               |                       |
| <b>Age, years</b>                |                   |                 |                       |
| <b>Median (IQR)</b>              | 22 (7)            | 27 (9)          | 0.080                 |
| <b>Illness duration, years</b>   |                   |                 |                       |
| <b>Median (IQR)</b>              | 4 (6)             | 10 (10)         | 0.090                 |
| <b>Comorbidity, <i>n</i> (%)</b> | 4 (15)            | 3 (33)          | 0.224                 |
| <b>Nadir BMI</b>                 |                   |                 |                       |
| <b>Median (IQR)</b>              | 12.1 (2.2)        | 11.3 (3.8)      | 0.780                 |
| <b>Education, years</b>          |                   |                 |                       |
| <b>Median (IQR)</b>              | 12 (3)            | 12 (3)          | 0.371                 |
| <b>BMI baseline</b>              |                   |                 |                       |
| <b>Median (IQR)</b>              | 12.9 (2.4)        | 12.7 (5.2)      | 0.666                 |
| <b>4 weeks weight change, %</b>  |                   |                 |                       |
| <b>Median (IQR)</b>              | -3.9 (8.7)        | 0 (8.8)         | 0.192                 |
| <b>TAS-20 total score</b>        |                   |                 |                       |
| <b>Median (IQR)</b>              | 58 (21)           | 58 (17)         | 0.511                 |
| <b>PSS-10 total score</b>        |                   |                 |                       |
| <b>Median (IQR)</b>              | 28 (8)            | 26 (3)          | 0.712                 |
| <b>HADS anxiety subscale</b>     |                   |                 |                       |
| <b>Median (IQR)</b>              | 14 (4)            | 12 (6)          | 0.206                 |
| <b>HADS depression subscale</b>  |                   |                 |                       |
| <b>Median (IQR)</b>              | 11 (4)            | 7 (6)           | 0.065                 |
| <b>BDI-II totalscore</b>         |                   |                 |                       |
| <b>Median (IQR)</b>              | 36 (14)           | 27 (15)         | 0.274                 |
| <b>EDI-3 DT subscale</b>         |                   |                 |                       |
| <b>Median (IQR)</b>              | 22 (9)            | 16 (16)         | 0.265                 |
| <b>EDI-3 B subscale</b>          |                   |                 |                       |
| <b>Median (IQR)</b>              | 3 (9)             | 7 (9)           | 0.198                 |
| <b>EDI-3 BD subscale</b>         |                   |                 |                       |
| <b>Median (IQR)</b>              | 32 (15)           | 28 (22)         | 0.534                 |

|                           |         |         |        |
|---------------------------|---------|---------|--------|
| <b>EDI-3 LSE subscale</b> |         |         |        |
| <b>Median (IQR)</b>       | 18 (6)  | 13 (10) | 0.169  |
| <b>EDI-3 PA subscale</b>  |         |         |        |
| <b>Median (IQR)</b>       | 13 (8)  | 13 (7)  | 0.950  |
| <b>EDI-3 II subscale</b>  |         |         |        |
| <b>Median (IQR)</b>       | 12 (9)  | 7 (13)  | 0.646  |
| <b>EDI-3 IA subscale</b>  |         |         |        |
| <b>Median (IQR)</b>       | 7 (9)   | 6 (11)  | 0.522  |
| <b>EDI-3 ID subscale</b>  |         |         |        |
| <b>Median (IQR)</b>       | 17 (14) | 17 (14) | 0.921  |
| <b>EDI-3 ED subscale</b>  |         |         |        |
| <b>Median (IQR)</b>       | 10 (11) | 11 (15) | >0.999 |
| <b>EDI-3 P subscale</b>   |         |         |        |
| <b>Median (IQR)</b>       | 9 (12)  | 13 (7)  | 0.978  |
| <b>EDI-3 A subscale</b>   |         |         |        |
| <b>Median (IQR)</b>       | 14 (14) | 10 (9)  | 0.907  |
| <b>EDI-3 MF subscale</b>  |         |         |        |
| <b>Median (IQR)</b>       | 14 (12) | 8 (10)  | 0.195  |

*n*=3 dropouts did not complete the questionnaires but completed urine and blood samples at follow-up.

IQR: interquartile range, BMI: body mass index, TAS-20: Toronto Alexithymia Scale-20, PSS-10: Perceived Stress Scale 10, HADS: Hospital Anxiety and Depression Scale, BDI-II: Beck Depression Inventory II, EDI-3: Eating Disorder Inventory 3, DT: Drive for Thinness, B: Bulimia, BD: Body Dissatisfaction, LSE: Low Self-Esteem, PA: Personal Alienation, II: Interpersonal Insecurity, IA: Interpersonal Alienation, ID: Interoceptive Deficits, ED: Emotional Dysregulation, P: Perfectionism, A: Asceticism, and MF: Maturity Fears.

## 2. Correlations between Cortisol levels and Psychometrics

The following table reports all correlations between cortisol and psychometric variables including delta variables.

**Supplementary Table 2.** Correlations between biochemical and psychometric variables

|                    | <u>vs.</u>      | <u>rho</u> | <u>p-value</u> |
|--------------------|-----------------|------------|----------------|
| Delta Cortisol/CBG | Delta TAS_20    | 0.03       | 0.895          |
|                    | Delta PSS-10    | 0.08       | 0.719          |
|                    | Delta HADS-A    | -0.04      | 0.855          |
|                    | Delta HADS-D    | -0.18      | 0.400          |
|                    | Delta BDI-II    | -0.18      | 0.396          |
|                    | Delta EDI-3 DT  | 0.05       | 0.816          |
|                    | Delta EDI-3 B   | -0.05      | 0.799          |
|                    | Delta EDI-3 BD  | -0.11      | 0.590          |
|                    | Delta EDI-3 LSE | 0.03       | 0.878          |
|                    | Delta EDI-3 PA  | 0.06       | 0.773          |
|                    | Delta EDI-3 II  | 0.07       | 0.743          |

|                              |                    |       |       |
|------------------------------|--------------------|-------|-------|
|                              | Delta EDI-3 IA     | 0.13  | 0.522 |
|                              | Delta EDI-3 ID     | 0.20  | 0.332 |
|                              | Delta EDI-3 ED     | -0.16 | 0.438 |
|                              | Delta EDI-3 P      | 0.17  | 0.405 |
|                              | Delta EDI-3 A      | 0.17  | 0.416 |
|                              | Delta EDI-3 MF     | 0.13  | 0.538 |
| Delta 24-Hour Urine Cortisol | Delta TAS_20       | 0.27  | 0.188 |
|                              | Delta PSS-10       | -0.19 | 0.361 |
|                              | Delta HADS-A       | -0.07 | 0.744 |
|                              | Delta HADS-D       | -0.03 | 0.883 |
|                              | Delta BDI-II       | 0.12  | 0.575 |
|                              | Delta EDI-3 DT     | 0.08  | 0.704 |
|                              | Delta EDI-3 B      | 0.17  | 0.413 |
|                              | Delta EDI-3 BD     | -0.05 | 0.805 |
|                              | Delta EDI-3 LSE    | -0.04 | 0.866 |
|                              | Delta EDI-3 PA     | 0.13  | 0.538 |
|                              | Delta EDI-3 II     | 0.26  | 0.201 |
|                              | Delta EDI-3 IA     | -0.21 | 0.316 |
|                              | Delta EDI-3 ID     | -0.18 | 0.395 |
|                              | Delta EDI-3 ED     | 0.38  | 0.061 |
|                              | Delta EDI-3 P      | 0.43  | 0.031 |
|                              | Delta EDI-3 A      | 0.35  | 0.088 |
|                              | Delta EDI-3 MF     | -0.20 | 0.330 |
| Delta plasma cortisol        | Delta TAS_20       | -0.22 | 0.300 |
|                              | Delta PSS-10       | -0.13 | 0.528 |
|                              | Delta HADS-A       | 0.22  | 0.291 |
|                              | Delta HADS-D       | -0.16 | 0.447 |
|                              | Delta BDI-II       | -0.20 | 0.326 |
|                              | Delta EDI-3 DT     | -0.04 | 0.859 |
|                              | Delta EDI-3 B      | -0.34 | 0.094 |
|                              | Delta EDI-3 BD     | -0.09 | 0.667 |
|                              | Delta EDI-3 LSE    | -0.08 | 0.699 |
|                              | Delta EDI-3 PA     | 0.06  | 0.782 |
|                              | Delta EDI-3 II     | 0.10  | 0.638 |
|                              | Delta EDI-3 IA     | 0.07  | 0.746 |
|                              | Delta EDI-3 ID     | 0.07  | 0.740 |
|                              | Delta EDI-3 ED     | -0.12 | 0.569 |
|                              | Delta EDI-3 P      | 0.19  | 0.351 |
|                              | Delta EDI-3 A      | -0.13 | 0.526 |
|                              | Delta EDI-3 MF     | 0.32  | 0.120 |
| Baseline plasma cortisol     | Baseline TAS_20    | -0.19 | 0.338 |
|                              | Baseline PSS-10    | 0.09  | 0.655 |
|                              | Baseline HADS-A    | 0.20  | 0.328 |
|                              | Baseline HADS-D    | -0.14 | 0.476 |
|                              | Baseline BDI-II    | -0.13 | 0.513 |
|                              | Baseline EDI-3 DT  | 0.08  | 0.694 |
|                              | Baseline EDI-3 B   | 0.28  | 0.163 |
|                              | Baseline EDI-3 BD  | -0.11 | 0.585 |
|                              | Baseline EDI-3 LSE | -0.18 | 0.376 |

|                                 |                    |       |       |
|---------------------------------|--------------------|-------|-------|
|                                 | Baseline EDI-3 PA  | -0.09 | 0.670 |
|                                 | Baseline EDI-3 II  | -0.24 | 0.248 |
|                                 | Baseline EDI-3 IA  | -0.14 | 0.472 |
|                                 | Baseline EDI-3 ID  | 0.06  | 0.769 |
|                                 | Baseline EDI-3 ED  | -0.18 | 0.361 |
|                                 | Baseline EDI-3 P   | -0.05 | 0.817 |
|                                 | Baseline EDI-3 A   | -0.20 | 0.314 |
|                                 | Baseline EDI-3 MF  | 0.19  | 0.339 |
| Baseline 24-Hour Urine Cortisol | Baseline TAS_20    | -0.12 | 0.551 |
|                                 | Baseline PSS-10    | -0.31 | 0.120 |
|                                 | Baseline HADS-A    | -0.30 | 0.130 |
|                                 | Baseline HADS-D    | -0.28 | 0.157 |
|                                 | Baseline BDI-II    | -0.39 | 0.042 |
|                                 | Baseline EDI-3 DT  | -0.55 | 0.003 |
|                                 | Baseline EDI-3 B   | -0.17 | 0.385 |
|                                 | Baseline EDI-3 BD  | -0.46 | 0.017 |
|                                 | Baseline EDI-3 LSE | -0.36 | 0.065 |
|                                 | Baseline EDI-3 PA  | -0.26 | 0.187 |
|                                 | Baseline EDI-3 II  | -0.11 | 0.600 |
|                                 | Baseline EDI-3 IA  | -0.31 | 0.112 |
|                                 | Baseline EDI-3 ID  | -0.18 | 0.382 |
|                                 | Baseline EDI-3 ED  | -0.32 | 0.101 |
|                                 | Baseline EDI-3 P   | -0.41 | 0.035 |
|                                 | Baseline EDI-3 A   | -0.25 | 0.207 |
|                                 | Baseline EDI-3 MF  | 0.19  | 0.339 |
| Baseline Cortisol/CBG           | Baseline TAS_20    | 0.01  | 0.953 |
|                                 | Baseline PSS-10    | 0.05  | 0.800 |
|                                 | Baseline HADS-A    | -0.03 | 0.871 |
|                                 | Baseline HADS-D    | 0.22  | 0.274 |
|                                 | Baseline BDI-II    | -0.07 | 0.725 |
|                                 | Baseline EDI-3 DT  | -0.15 | 0.454 |
|                                 | Baseline EDI-3 B   | 0.30  | 0.127 |
|                                 | Baseline EDI-3 BD  | -0.51 | 0.007 |
|                                 | Baseline EDI-3 LSE | -0.14 | 0.488 |
|                                 | Baseline EDI-3 PA  | -0.11 | 0.591 |
|                                 | Baseline EDI-3 II  | -0.02 | 0.937 |
|                                 | Baseline EDI-3 IA  | -0.05 | 0.789 |
|                                 | Baseline EDI-3 ID  | -0.05 | 0.823 |
|                                 | Baseline EDI-3 ED  | -0.26 | 0.196 |
|                                 | Baseline EDI-3 P   | -0.40 | 0.039 |
|                                 | Baseline EDI-3 A   | -0.11 | 0.572 |
|                                 | Baseline EDI-3 MF  | 0.48  | 0.011 |
| Follow-up plasma cortisol       | Follow-up TAS_20   | 0.06  | 0.778 |
|                                 | Follow-up PSS-10   | -0.08 | 0.711 |
|                                 | Follow-up HADS-A   | -0.01 | 0.956 |
|                                 | Follow-up HADS-D   | -0.11 | 0.597 |
|                                 | Follow-up BDI-II   | 0.01  | 0.956 |
|                                 | Follow-up EDI-3 DT | -0.33 | 0.102 |

|                                  |                     |       |       |
|----------------------------------|---------------------|-------|-------|
|                                  | Follow-up EDI-3 B   | -0.13 | 0.540 |
|                                  | Follow-up EDI-3 BD  | -0.29 | 0.160 |
|                                  | Follow-up EDI-3 LSE | -0.38 | 0.059 |
|                                  | Follow-up EDI-3 PA  | -0.05 | 0.830 |
|                                  | Follow-up EDI-3 II  | 0.26  | 0.218 |
|                                  | Follow-up EDI-3 IA  | -0.29 | 0.162 |
|                                  | Follow-up EDI-3 ID  | 0.01  | 0.968 |
|                                  | Follow-up EDI-3 ED  | -0.08 | 0.721 |
|                                  | Follow-up EDI-3 P   | -0.17 | 0.407 |
|                                  | Follow-up EDI-3 A   | 0.06  | 0.770 |
|                                  | Follow-up EDI-3 MF  | 0.08  | 0.700 |
| Follow-up 24-Hour Urine Cortisol | Follow-up TAS_20    | -0.03 | 0.874 |
|                                  | Follow-up PSS-10    | -0.21 | 0.324 |
|                                  | Follow-up HADS-A    | -0.11 | 0.593 |
|                                  | Follow-up HADS-D    | -0.11 | 0.587 |
|                                  | Follow-up BDI-II    | -0.12 | 0.564 |
|                                  | Follow-up EDI-3 DT  | -0.38 | 0.059 |
|                                  | Follow-up EDI-3 B   | -0.18 | 0.397 |
|                                  | Follow-up EDI-3 BD  | -0.46 | 0.022 |
|                                  | Follow-up EDI-3 LSE | -0.35 | 0.083 |
|                                  | Follow-up EDI-3 PA  | -0.03 | 0.875 |
|                                  | Follow-up EDI-3 II  | 0.16  | 0.457 |
|                                  | Follow-up EDI-3 IA  | -0.20 | 0.350 |
|                                  | Follow-up EDI-3 ID  | -0.17 | 0.420 |
|                                  | Follow-up EDI-3 ED  | -0.17 | 0.422 |
|                                  | Follow-up EDI-3 P   | -0.43 | 0.034 |
|                                  | Follow-up EDI-3 A   | -0.15 | 0.482 |
| Follow-up EDI-3 MF               | -0.01               | 0.950 |       |
| Follow-up Cortisol/CBG           | Follow-up TAS_20    | 0.11  | 0.615 |
|                                  | Follow-up PSS-10    | -0.10 | 0.636 |
|                                  | Follow-up HADS-A    | -0.20 | 0.343 |
|                                  | Follow-up HADS-D    | -0.28 | 0.174 |
|                                  | Follow-up BDI-II    | -0.28 | 0.169 |
|                                  | Follow-up EDI-3 DT  | -0.25 | 0.219 |
|                                  | Follow-up EDI-3 B   | -0.20 | 0.343 |
|                                  | Follow-up EDI-3 BD  | -0.18 | 0.384 |
|                                  | Follow-up EDI-3 LSE | -0.39 | 0.054 |
|                                  | Follow-up EDI-3 PA  | -0.19 | 0.365 |
|                                  | Follow-up EDI-3 II  | -0.21 | 0.320 |
|                                  | Follow-up EDI-3 IA  | -0.41 | 0.040 |
|                                  | Follow-up EDI-3 ID  | -0.08 | 0.721 |
|                                  | Follow-up EDI-3 ED  | -0.22 | 0.302 |
|                                  | Follow-up EDI-3 P   | -0.20 | 0.331 |
|                                  | Follow-up EDI-3 A   | 0.14  | 0.517 |
| Follow-up EDI-3 MF               | -0.06               | 0.779 |       |

Analysis was performed using Spearman's correlation. **Significance level (Šidák correction):  $\alpha = 3.351941 \times 10^{-4}$ .**

---

CBG: cortisol binding globulin, TAS-20: Toronto Alexithymia Scale-20, PSS-10: Perceived Stress Scale 10, HADS: Hospital Anxiety and Depression Scale, BDI-II: Beck Depression Inventory II, EDI-3: Eating Disorder Inventory 3, DT: Drive for Thinness, B: Bulimia, BD: Body Dissatisfaction, LSE: Low Self-Esteem, PA: Personal Alienation, II: Interpersonal Insecurity, IA: Interpersonal Alienation, ID: Interoceptive Deficits, ED: Emotional Dysregulation, P: Perfectionism, A: Asceticism, and MF: Maturity Fears.
